# Supplementary material
Source: PubMed Central journal article supplement (PMC3309196)
Supplement: mmc1.pdf [file mmc1.pdf]

## Supplementary Data

### Mutations in the Recessive Deafness Locus *LOXHD1*

#### Cause Dominant Late-Onset Fuchs Corneal Dystrophy

S. Amer Riazuddin, David S. Parker, Elyse J. McGlumphy, Edwin C. Oh, Benjamin W. Iliff, Thore Schmedt, Ula Jurkunas, Robert Schleif, Nicholas Katsanis, and John D. Gottsch

Table S1. Quantitative RT-PCR of *LOXHD1* in Cultured Human Corneal Endothelial Cells

| cDNA Source                              | <i>LOXHD1</i><br>C <sub>T</sub> | GAPDH<br>C <sub>T</sub> | $\beta$ -Actin<br>C <sub>T</sub> | $\delta C_T$<br><i>LOXHD1</i> -<br><i>GAPDH</i> | $\delta C_T$<br><i>LOXHD1</i> - $\beta$ -Actin |
|------------------------------------------|---------------------------------|-------------------------|----------------------------------|-------------------------------------------------|------------------------------------------------|
| Cultured human corneal endothelial cells | 34                              | 15                      | 16                               | 19                                              | 18                                             |

Quantitative RT-PCR was performed in triplicate using cDNA reverse transcribed from RNA from cultured human corneal endothelial cells. The mean threshold cycle (CT) value for each target (*Loxhd1*) and endogenous reference (GAPDH &  $\beta$ -actin), representing the PCR cycle at which the ABI 7900 HT Detection System first detects a noticeable increase in reporter fluorescence above baseline signal, was calculated for each group. The  $\delta C_T$  values for each target were determined by subtracting the mean of the endogenous reference (GAPDH &  $\beta$ -actin), value from the mean *LOXHD1* value. Note: all values are obtained after averaging the results of three independent experiments.

Table S2. Characteristics of *LOXHD1* Variants Identified in (A) Late-Onset FCD Cases and (B) Ethnically Matched Control Samples

A.

| No | Mutation (DNA)           | Mutation (Protein) | Presence in Ethnically Matched | Evolutionary Conservation in <i>LOXHD1</i> Orthologs                                               | PolyPhen2 Predictions |
|----|--------------------------|--------------------|--------------------------------|----------------------------------------------------------------------------------------------------|-----------------------|
| 1  | c.159T>G                 | p.Asp53Glu         | 0 in 384 Control chromosomes   | Hu, Ch, Or, Rh, Ba, Mr, Bu, Mo, Ra, Ka, Gu, Ra, Do, Co, Hr, Ca, Do, He, Op, Pl                     | unknown               |
| 2  | c.242G>A                 | p.Ser81Asn         | 0 in 384 Control chromosomes   | Hu, Ch, Or, Rh, Ba, Mr, Bu, Mo, Ra, Ka, Gu, Ra, Pi, Do, Co, Hr, Ca, Do, Mi, Sh, El, Am, Op, Pl     | unknown               |
| 3  | c.469C>T                 | p.Arg157Cys        | 0 in 384 Control chromosomes   | Hu, Ch, Or, Rh, Ba, Mr, Bu, Mo, Ra, Ka, Gu, Ra, Pi, Do, Co, Hr, Ca, Do, Mi, Sh, El, Am, Op, Pl     | unknown               |
| 4  | c.1570C>T                | p.Arg524Cys        | 0 in 384 Control chromosomes   | Hu, Ch, Or, Rh, Ba, Mr, Bu, Mo, Ra, Ka, Gu, Ra, Pi, Do, Co, Hr, Ca, Do, Mi, He, Sh, El, Am, Op, Pl | Probably damaging     |
| 5  | c.1639C>T                | *p.Arg547Cys       | 0 in 384 Control chromosomes   | Hu, Rh, Mr, Mo, Ra, Ka, Gu, Ra, Pi, Do, Co, Hr, Ca, Do, Mi, He, El, Op, Pl                         | Probably damaging     |
| 6  | c.1759C>T                | p.Arg587Trp        | 0 in 384 Control chromosomes   | Hu, Ch, Or, Rh, Ba, Mr, Bu, Mo, Ra, Ka, Gu, Ra, Pi, Do, Co, Hr, Ca, Do, Mi, He, El, Op, Pl         | Probably damaging     |
| 7  | c.1945G>A                | p.Asp649Asn        | 0 in 384 Control chromosomes   | Hu, Ch, Or, Rh, Ba, Mr, Bu, Ra, Ka, Gu, Ra, Pi, Do, Co, Hr, Ca, Do, Mi, He, El, Op, Pl             | Benign                |
| 8  | c.2251C>T                | p.Arg751Trp        | 0 in 384 Control chromosomes   | Hu, Ch, Or, Rh, Ba, Mr, Bu, Mo, Ra, Ka, Gu, Ra, Pi, Do, Co, Hr, Ca, Do, Mi, He, Sh, El, Am, Op, Pl | Probably damaging     |
| 9  | c.2359C>T                | p.Arg787Cys        | 0 in 384 Control chromosomes   | Hu, Ch, Or, Rh, Ba, Mr, Bu, Mo, Ra, Ka, Gu, Ra, Pi, Do, Co, Hr, Ca, Do, Mi, He, Sh, El, Am, Op, Pl | Probably damaging     |
| 10 | c.3874C>T                | p.Leu1292Phe       | 0 in 384 Control chromosomes   | Hu, Ch, Or, Rh, Ba, Mr, Bu, Mo, Ra, Ka, Gu, Ra, Pi, Do, Co, Hr, Ca, Do, Mi, He, Sh, El, Am, Op, Pl | Probably damaging     |
| 11 | c.5224G>A                | p.Glu1742Lys       | 0 in 384 Control chromosomes   | Hu, Ch, Or, Rh, Ba, Mr, Bu, Mo, Ra, Ka, Gu, Ra, Pi, Do, Co, Hr, Ca, Do, Mi, He, Sh, El, Am, Op, Pl | Possibly damaging     |
| 12 | c.5272A>T                | p.Thr1758Ser       | 0 in 384 Control chromosomes   | Hu, Ch, Or, Rh, Ba, Mr, Bu, Mo, Ra, Ka, Gu, Ra, Pi, Do, Co, Hr, Ca, Do, Mi, He, Sh, El, Am, Op, Pl | Possibly damaging     |
| 13 | c.5398C>T                | p.Arg1800Trp       | 0 in 384 Control chromosomes   | Hu, Ch, Or, Rh, Ba, Mr, Bu, Mo, Ra, Ka, Gu, Ra, Pi, Do, Co, Hr, Ca, Do, Mi, He, Sh, El, Am, Op, Pl | Probably damaging     |
| 14 | c.5953G>C                | p.Glu1985Gln       | 0 in 384 Control chromosomes   | Hu, Ch, Or, Rh, Ba, Mr, Bu, Mo, Ra, Ka, Gu, Ra, Pi, Do, Co, Hr, Ca, Do, Mi, He, Sh, El, Am, Op, Pl | Possibly damaging     |
| 15 | c.6112C>A                | p.His2038Asn       | 0 in 384 Control chromosomes   | Hu, Ch, Or, Rh, Ba, Mr, Bu, Mo, Ra, Ka, Gu, Ra, Pi, Do, Co, Hr, Ca, Do, Mi, He, Sh, El, Am, Op, Pl | Possibly damaging     |
| 16 | c.1904T>C (NM_001145472) | p.Leu635Pro        | 0 in 384 Control chromosomes   | Hu, Ch, Or, Rh, Ba, Mr, Bu, Mo, Ra, Ka, Gu, Ra, Pi, Do, Co, Hr, Ca, Do, Mi, He, Sh, El, Am, Op     | Possibly damaging     |

## B.

| No | Mutation (DNA) | Mutation (Protein) | Evolutionary Conservation in <i>LOXHD1</i> Orthologs                                               | PolyPhen2 Predictions |
|----|----------------|--------------------|----------------------------------------------------------------------------------------------------|-----------------------|
| 1  | c.166G>A       | p.Gly56Ser         | Hu, Ch, Or, Rh, Ba, Mr, Bu, Mo, Ra, Ka, Gu, Ra, Pi, Do, Co, Hr, Ca, Do, Mi, He, Sh, El, Am, Op, Pl | Probably damaging     |
| 2  | c.3940A>T      | p.Thr1314Ser       | Hu, Ch, Or, Rh, Ba, Mr, Bu, Mo, Ra, Ka, Gu, Ra, Pi, Do, Co, Hr, Ca, Do, Mi, He, Sh, El, Am, Op, Pl | Probably damaging     |
| 3  | c.4526G>A      | p.Gly1509Glu       | Hu, Ch, Or, Rh, Ba, Mr, Bu, Mo, Ra, Ka, Gu, Ra, Pi, Do, Co, Hr, Ca, Do, Mi, He, Sh, El, Am, Op, Pl | Probably damaging     |
| 4  | c.5005G>A      | p.Gly1669Arg       | Hu, Ch, Or, Rh, Ba, Mr, Bu, Mo, Ra, Ka, Gu, Ra, Pi, Do, Co, Hr, Ca, Do, Mi, He, Sh, El, Am, Op, Pl | Probably damaging     |
| 5  | c.5024G>A      | p.Arg1675His       | Hu, Ch, Or, Rh, Ba, Mr, Bu, Mo, Ra, Ka, Gu, Ra, Pi, Do, Co, Hr, Ca, Do, Mi, He, Sh, El, Am, Op, Pl | Probably damaging     |
| 6  | c.5087T>G      | p.Val1696Gly       | Hu, Ch, Or, Rh, Ba, Mr, Bu, Mo, Ra, Ka, Gu, Ra, Pi, Do, Co, Hr, Ca, Do, Mi, He, Sh, El, Am, Op, Pl | Probably damaging     |
| 7  | c.5173G>A      | p.Gly1725Arg       | Hu, Ch, Or, Rh, Ba, Mr, Bu, Mo, Ra, Ka, Gu, Ra, Pi, Do, Co, Hr, Ca, Do, Mi, He, Sh, El, Am, Op, Pl | Probably damaging     |
| 8  | c.5869G>A      | p.Glu1957Lys       | Hu, Ch, Or, Rh, Ba, Mr, Bu, Mo, Ra, Ka, Gu, Ra, Pi, Do, Co, Hr, Ca, Do, Mi, He, Sh, El, Am, Op, Pl | Probably damaging     |

H: human; Ch: Chimp; Or: Orangutan; Rh: Rhesus; Ba: Baboon; Mr: Marmoset; Bu: Bushbaby; Mo: Mouse; Ra: Rat; Ka: Kangaroo\_rat; Gu: Guinea\_pig; Ra: Rabbit; Pi: Pika; Do: Dolphin; Co: Cow; Hr: Horse; Ca: Cat; Do: Dog; Mi: Microbat; He: Hedgehog; Sh: Shrew; El: Elephant; Am: Armadillo; Op: Opossum; Pl: Platypus. \* represent the mutation segregating in family "HU."  
 Note: The DNA mutation numbering system used is based on cDNA sequence.
